# Large-Scale Pathway-Based Analysis of Bladder Cancer Genome-Wide Association Data from Five Studies of European Background

Idan Menashe<sup>1\*9</sup>, Jonine D. Figueroa<sup>19</sup>, Montserrat Garcia-Closas<sup>2</sup>, Nilanjan Chatterjee<sup>1</sup>, Nuria Malats<sup>3</sup>, Antoni Picornell<sup>3</sup>, Dennis Maeder<sup>1</sup>, Qi Yang<sup>1</sup>, Ludmila Prokunina-Olsson<sup>1</sup>, Zhaoming Wang<sup>4</sup>, Francisco X. Real<sup>3,5</sup>, Kevin B. Jacobs<sup>4</sup>, Dalsu Baris<sup>1</sup>, Michael Thun<sup>6</sup>, Demetrius Albanes<sup>1</sup>, Mark P. Purdue<sup>1</sup>, Manolis Kogevinas<sup>7,8,9,10</sup>, Amy Hutchinson<sup>4</sup>, Yi-Ping Fu<sup>1</sup>, Wei Tang<sup>1</sup>, Laurie Burdette<sup>4</sup>, Adonina Tardón<sup>9</sup>, Consol Serra<sup>9,11</sup>, Alfredo Carrato<sup>12</sup>, Reina García-Closas<sup>13</sup>, Josep Lloreta<sup>14</sup>, Alison Johnson<sup>15</sup>, Molly Schwenn<sup>16</sup>, Alan Schned<sup>17</sup>, Gerald Andriole Jr.<sup>18</sup>, Amanda Black<sup>1</sup>, Eric J. Jacobs<sup>6</sup>, Ryan W. Diver<sup>6</sup>, Susan M. Gapstur<sup>6</sup>, Stephanie J. Weinstein<sup>1</sup>, Jarmo Virtamo<sup>19</sup>, Neil E. Caporaso<sup>1</sup>, Maria Teresa Landi<sup>1</sup>, Joseph F. Fraumeni Jr.<sup>1</sup>, Stephen J. Chanock<sup>1</sup>, Debra T. Silverman<sup>1</sup>, Nathaniel Rothman<sup>1</sup>

**1** Division of Cancer Epidemiology and Genetics, National Cancer Institute, Bethesda, Maryland, United States of America, **2** Institute for Cancer Research, Surrey, United Kingdom, **3** Spanish National Cancer Research Centre, Madrid, Spain, **4** Core Genotype Facility, SAIC-Frederick, Inc., National Cancer Institute-Frederick, Frederick, Maryland, United States of America, **5** Departament de Ciències Experimentals i de la Salut, Universitat Pompeu Fabra, Barcelona, Spain, **6** Epidemiology Research Program, American Cancer Society, Atlanta, Georgia, United States of America, **7** Centre for Research in Environmental Epidemiology (CREAL), Barcelona, Spain, **8** Municipal Institute of Medical Research, Barcelona, Spain, **9** CIBER Epidemiología y Salud Pública (CIBERESP), Barcelona, Spain, **10** National School of Public Health, Athens, Greece, **11** Universitat Pompeu Fabra, Barcelona, Spain, **12** Ramón y Cajal University Hospital, Madrid, Spain, **13** Unidad de Investigación, Hospital Universitario de Canarias, La Laguna, Spain, **14** Hospital del Mar-Institut Municipal d'Investigació Mèdica (IMIM), Universitat Pompeu Fabra, Barcelona, Spain, **15** Vermont Cancer Registry, Burlington, Vermont, United States of America, **16** Maine Cancer Registry, Augusta, Maine, United States of America, **17** Dartmouth Medical School, Hanover, New Hampshire, United States of America, **18** Department of Urology, Washington University School of Medicine, St. Louis, Missouri, United States of America, **19** National Institute for Health and Welfare, Helsinki, Finland

## Abstract

Pathway analysis of genome-wide association studies (GWAS) offer a unique opportunity to collectively evaluate genetic variants with effects that are too small to be detected individually. We applied a pathway analysis to a bladder cancer GWAS containing data from 3,532 cases and 5,120 controls of European background ( $n = 5$  studies). Three hundred and ninety-nine pathways were drawn from five publicly available resources (Biocarta, Kegg, NCI-PID, HumanCyc, and Reactome), and we constructed 22 additional candidate pathways previously hypothesized to be related to bladder cancer. In total, 1421 pathways, 5647 genes and  $\sim 90,000$  SNPs were included in our study. Logistic regression model adjusting for age, sex, study, DNA source, and smoking status was used to assess the marginal trend effect of SNPs on bladder cancer risk. Two complementary pathway-based methods (gene-set enrichment analysis [GSEA], and adapted rank-truncated product [ARTP]) were used to assess the enrichment of association signals within each pathway. Eighteen pathways were detected by either GSEA or ARTP at  $P \leq 0.01$ . To minimize false positives, we used the  $I^2$  statistic to identify SNPs displaying heterogeneous effects across the five studies. After removing these SNPs, seven pathways ('Aromatic amine metabolism' [ $P_{GSEA} = 0.0100$ ,  $P_{ARTP} = 0.0020$ ], 'NAD biosynthesis' [ $P_{GSEA} = 0.0018$ ,  $P_{ARTP} = 0.0086$ ], 'NAD salvage' [ $P_{ARTP} = 0.0068$ ], 'Clathrin derived vesicle budding' [ $P_{ARTP} = 0.0018$ ], 'Lysosome vesicle biogenesis' [ $P_{GSEA} = 0.0023$ ,  $P_{ARTP} < 0.00012$ ], 'Retrograde neurotrophin signaling' [ $P_{GSEA} = 0.00840$ ], and 'Mitotic metaphase/anaphase transition' [ $P_{GSEA} = 0.0040$ ]) remained. These pathways seem to belong to three fundamental cellular processes (metabolic detoxification, mitosis, and clathrin-mediated vesicles). Identification of the aromatic amine metabolism pathway provides support for the ability of this approach to identify pathways with established relevance to bladder carcinogenesis.

**Citation:** Menashe I, Figueroa JD, Garcia-Closas M, Chatterjee N, Malats N, et al. (2012) Large-Scale Pathway-Based Analysis of Bladder Cancer Genome-Wide Association Data from Five Studies of European Background. PLoS ONE 7(1): e29396. doi:10.1371/journal.pone.0029396

**Editor:** Zhongming Zhao, Vanderbilt University Medical Center, United States of America

**Received:** September 14, 2011; **Accepted:** November 28, 2011; **Published:** January 4, 2012

This is an open-access article, free of all copyright, and may be freely reproduced, distributed, transmitted, modified, built upon, or otherwise used by anyone for any lawful purpose. The work is made available under the Creative Commons CC0 public domain dedication.

**Funding:** This project has been funded in part with federal funds from the National Cancer Institute, National Institutes of Health, under Contract No. HHSN261200800001E. The content of this publication does not necessarily reflect the views or policies of the Department of Health and Human Services, nor does mention of trade names, commercial products, or organizations imply endorsement by the U.S. Government. Support for individual studies that participated in the effort is as follows: SBCS (Dr. Silverman) - Intramural Research Program of the National Institutes of Health, National Cancer Institute, Division of Cancer Epidemiology and Genetics and intramural contract number NCI N02-CP-11015. FIS/Spain 98/1274, FIS/Spain 00/0745, PI061614, and G03/174, Fundació Marató TV3, Red Temática Investigación Cooperativa en Cáncer (RTICC), Consolider ONCOBIO, EU-FP7-201663; and R01- CA089715 and CA34627. NEBCS (Dr. Silverman) - Intramural research program of the National Institutes of Health, National Cancer Institute, Division of Cancer Epidemiology and Genetics and intramural contract number NCI N02-CP-01037 PLCO (Dr. Purdue) - The National Institutes of Health (NIH) Genes, Environment and Health Initiative (GEI) partly funded DNA extraction and statistical analyses (HG-06-033-NCI-01 and R01HL091172-01), genotyping at the Johns Hopkins University Center for Inherited Disease Research (U01HG004438 and NIH HHSN268200782096C), and study coordination at the GENEVA (Dr. Caporaso)- The NIH Genes, Environment and Health Initiative [GEI] partly funded DNA extraction and statistical analyses (HG-06-033-NCI-01 and R01HL091172-01), genotyping at the Johns Hopkins University Center for Inherited Disease Research (U01HG004438 and NIH HHSN268200782096C) and study coordination at the GENEVA Coordination Center (U01HG004446) for EAGLE and part of PLCO studies. Genotyping for the remaining part of PLCO and all ATBC and CPS-II samples were supported by the Intramural Research Program of the National Institutes of Health, NCI, Division of Cancer Epidemiology and Genetics. The PLCO is supported by the Intramural Research Program of the Division of Cancer Epidemiology and Genetics and supported by contracts from the Division of Cancer Prevention, National Cancer Institute, National Institutes of Health. ATBC (Dr. Albanes) - This research was supported in part by the Intramural Research Program of the NIH and the National Cancer Institute. Additionally, this research was supported by U.S. Public Health Service contracts N01-CN-45165, N01-RC-45035, and N01-RC-37004 from the National Cancer Institute, Department of Health and Human Services. The funders had no role in study design, data collection and analysis, decision to publish, or preparation of the manuscript.

**Competing Interests:** The authors have declared that no competing interests exist.

\* E-mail: menashei@mail.nih.gov

☛ These authors contributed equally to this work.

## Introduction

Genome-wide association studies (GWAS) have served as a useful tool to identify common genetic variants associated with various complex traits [1]. As expected, each variant explains a tiny portion of the heritable component of their associated phenotypes [2,3]. Recently, Park and colleagues estimated that some proportion of the ‘missing heritability’ may reside in additional common low-penetrance susceptibility variants that can be discovered in larger GWAS [4]. In principle, other methods could complement the primary single-locus tests of GWAS in identifying additional susceptibility loci. One such approach is pathway (gene-set) analysis [5,6], which examines whether association signals of a collection of functionally related loci (typically genes) consistently deviate from what is expected by chance. This approach may suggest new candidate susceptibility loci and possibly provide insights into the mechanisms underlying complex traits. Pathway-based analyses have been applied to GWAS of complex diseases, including multiple sclerosis [7], type-2 diabetes [8,9], Crohn’s disease [10,11], Parkinson’s disease [12,13], colon [14] and breast [15] cancers.

Bladder cancer is the fourth most common malignancy among men in the western world [16]. Epidemiological studies have shown that exposure to aromatic amines (AAs) from tobacco smoking or occupation is strongly associated with bladder cancer risk [16,17,18,19]. Additionally, genetic studies have demonstrated that functional polymorphisms in two genes involved in carcinogen metabolism (N-acetyltransferase 2 [*NAT2*] and glutathione S-transferase M1 [*GSTM1*]) are associated with bladder cancer risk [20,21]. Notably, the risk of bladder cancer associated with *NAT2* slow acetylation genotype is restricted to smokers [20,22]. Recently, a series of GWAS have identified previously unknown susceptibility loci for bladder cancer, with the prospects of more to be discovered [22,23,24,25]. To identify additional regions that harbor plausible candidate genes and shed further light on genetic basis of this disease, we applied pathway analysis to the first stage of the NCI’s CGEMS bladder cancer GWAS containing 3,532 cases and 5,120 controls [22]. We report here seven pathways implicated in diverse carcinogenic processes to be enriched with bladder cancer susceptibility loci.

## Materials and Methods

### Study population

We applied our analyses to primary scan data of 591,637 SNPs from NCI’s bladder cancer GWAS containing 3,532 cases and 5,120 controls of European ancestry from five studies (Spanish Bladder Cancer Study [SBCS], New England, Maine and Vermont Bladder Cancer Study [NEBCS-ME/VT], Alpha-Tocopherol, Beta-Carotene Cancer Prevention Study [ATBC], the American Cancer Society Cancer Prevention Study II Nutrition Cohort [CPS-II], and the Prostate, Lung, Colorectal and Ovarian Cancer Screening Trial [PLCO]) [22].

### Pathway data construction

We collected gene-sets from five publicly available pathway resources: BioCarta [26], Kyoto Encyclopedia of Genes and Genomes (KEGG) [27], NCI’s Pathway Interaction Database (PID) [28], Reactome [29], and Encyclopedia of Homo sapiens Genes and Metabolism (HumanCyc) [30]. Inclusion criteria of pathways for analysis were those containing 5–100 genes to avoid testing too narrowly- or too broadly- defined functional categories. In addition, we constructed 22 candidate pathways (Table S2) based on known bladder cancer risk factors and general carcinogenic processes [31,32,33] which were not represented in the public databases above. Specifically, selection of genes was determined through 1) biochemical data for the detoxification of aromatic amines [34,35]; 2) Ingenuity pathway lists [36]; and 3) Gene ontology lists [37].

To explore the similarity between pathways in our database, we assessed the percentage of overlapping genes between each two pathways (A and B) as:

$$Overlap(\%) = \frac{\left( \frac{N_{[A \cap B]}}{N_{[A \cup B]}} + \frac{N_{[A \cap B]}}{\min\{N_A, N_B\}} \right)}{2} \times 100\% \quad (1)$$

where  $N_A$  and  $N_B$  are the number of genes within pathways A and B.

SNPs from the first stage of the NCI bladder cancer GWAS [22] were mapped to genes in these pathways if they were located in a region encompassing 20 kb 5’ upstream and 10 kb 3’

downstream from the genes' coding regions (NCBI's human genome build 36.3). These genes' boundaries were selected attempting to capture most of the gene's coding and regulatory variants [38] as well as minimizing the overlap between genes. Overall, 1,422 pathways containing 5,647 genes ( $24.3 \pm 21.7$  [mean  $\pm$  SD] genes per pathway) and  $\sim 92,000$  SNPs were included in our database. A complete list of the studied pathways is available in Table S1.

**Statistical analysis**

SNPs with MAF < 1% among controls were excluded from the analysis. We fitted logistic regression models adjusted for age, sex, study center, DNA source (buccal/blood), and smoking status (current/former/never/occasional), to assess the marginal effect of each SNP (1 degree of freedom trend test) on the risk of bladder cancer, as previously described [22]. For each gene  $G_j$  ( $j = 1, \dots, N$ , where  $N$  is the total number of genes in our dataset), the SNP with the lowest p-value among all SNPs that were mapped to its region was selected to represent the gene in the pathway analysis. We used two approaches to test for overrepresentation of association signals within pathways in our database:

- A. Gene-set enrichment analysis (GSEA; [12]): In this approach, the  $-\log_{10}$  of the p-value of each gene's best SNP was used as the gene's test statistics ( $r_j = -\log_{10}(p_j)$ ). Then, a weighted Kolmogorov-Smirnov procedure was used to assess for overrepresentation of gene's statistics Enrichment Score ( $ES$ ) within each pathway ( $S$ ) [15].

$$ES_S = \max_{1 \leq j \leq N} \left\{ \sum_{G_{j^*} \in S, j^* \leq j} \frac{|r_{j^*}|}{W_S} - \sum_{G_{j^*} \notin S, j^* \leq j} \frac{1}{N - N_H} \right\} \quad (2)$$

where,  $W_S = \sum_{G_{j^*} \in S} |r_{j^*}|$  and  $N_H$  is the number of genes in a pathway.

The statistical significance of  $ES_S$  was empirically evaluated using 10,000 permutations (permuting the genotype data between individuals and keeping the LD between SNPs intact).

- B. Adaptive Rank-Truncated Product (ARTP; [39]): In this approach the genes' best SNP p-values ( $p_j$ ) in each pathway were ordered from lowest to highest. Then, the mathematical product was computed for all possible sets of  $p_{(j)}$  such that

$$W(K) = \prod_{j=1}^K (p_{(j)}) \quad (3)$$

with  $K$ ,  $1 \leq K \leq L$ , being all possible integers (the truncation points) between 1 and  $L$ , with  $L$  being the number of genes in a pathway. In words,  $W(K)$  is simply the product of the  $K$  smallest  $P$ -values in a pathway. Next, we used the  $minP$  statistics [40,41] to evaluate what is the  $K$  truncation point where the  $W(K)$  get the most statistically significant value.

$$\min P = \min_{1 \leq j \leq J} \tilde{s}(K_j) \quad (4)$$

where  $\tilde{s}(K_j)$  be the estimated P-value for  $W(K_j)$ ,  $K_j \leq \dots \leq K$ . We then used two-level permutation procedure (10, 000 permutations, permuting the genotype data between individuals and keeping the LD structure between SNPs intact) to

estimate  $\tilde{s}(K_j)$ , and to adjust for multiple testing over the different truncation points used.

Using both the GSEA and ARTP methods that employ different approaches to assess the enrichment of gene-based signals within predefined gene-sets may facilitate capturing a broader range of candidate pathways for bladder cancer susceptibility.

Finally, we calculated a false discovery rate ( $FDR$ ) to assess the proportion of expected false positive findings in the GSEA and ARTP analyses. In short, we normalized the GSEA and ARTP statistics for each pathway ( $NS_S(GSEA)$  and  $NS_S(ARTP)$  respectively) based on the mean and standard deviation of the corresponding permutation data [12]. This procedure allows a direct comparison of pathways with different sizes and gene compositions. Then, we used these normalized statistics to calculate the FDR as:

$$FDR = \frac{\sum_S^{per} NS_S^{per} \geq NS_S^*}{\sum_S^{per} NS_S^{per}} / \frac{\sum_S NS_S \geq NS_S^*}{\sum_S NS_S} \quad (5)$$

**Genetic heterogeneity analysis**

To minimize false positives, we estimated the I-squared statistic ( $I^2$ ) [42] to identify SNPs displaying heterogeneous effects across the five studies [ATBC, CPSII, NEBCS (ME, VT), PLCO, and SBCS].  $I^2$  describes the proportion of total variation in study estimates that is due to heterogeneity. In short, a meta-analysis was applied to every SNP belonging to one of the top pathways using the genotype frequency counts of cases and controls to estimate per-allele OR and CI's. SNPs with  $I^2$  P-values < 0.2 were removed from further analyses. We evaluated the OR, CI and p values for both the meta-analysis and they were similar in both models, and did not change the interpretation of the data. These analyses were done using STATA (Version 11, STATA Corporation, College Station, TX).

**Results**

Overall, there was good correlation between the results of the GSEA and the ARTP methods ( $r = 0.74$ ,  $P < 0.0001$ ). A detailed examination of the results revealed that, on average, GSEA performed better in detecting pathways enriched with multiple weak association signals while ARTP appeared to be more powerful in detecting pathways where only few genes with relatively strong signals are dominating. Notably, the AA metabolism pathway, which contains several known bladder cancer susceptibility loci, was detected by both GSEA and ARTP methods ( $P_{GSEA} = 0.0100$ ,  $P_{ARTP} = 0.0020$ ). Therefore, we used its significance level as a reference for highlighting additional candidate susceptibility pathways. Of the 1421 pathways examined, 18 were significantly enriched with association signals at the  $P < 0.01$  level (Table 1). Of these, seven pathways were detected by both GSEA and ARTP, four pathways were detected only by GSEA, and seven were detected only by ARTP. After removing SNPs with heterogeneous effects across the five studies ( $I^2$  P-value < 0.2), the enrichment signals remained significant ( $P < 0.01$ ) in seven pathways belonging to four cellular processes ("aromatic amine [AA] metabolism", "Nicotinamide adenine dinucleotide [NAD] metabolism", "Clathrin-mediated vesicles", and "Mitosis"). For clarity, from this point forward, we will refer only to the results from the post heterogeneity analysis.

**Table 1.** Pathways enriched with bladder cancer susceptibility loci at a  $P \leq 0.01$  level using GSEA and ARTP.

| Pathway                                                                               | source   | GSEA                 |                      |                         | ARTP             |                      |                                 | Gene overlap (%) |                  |
|---------------------------------------------------------------------------------------|----------|----------------------|----------------------|-------------------------|------------------|----------------------|---------------------------------|------------------|------------------|
|                                                                                       |          | # genes <sup>1</sup> | # genes <sup>2</sup> | p-value <sup>3</sup>    | FDR <sup>4</sup> | # genes <sup>2</sup> | p-value <sup>3</sup>            |                  | FDR <sup>4</sup> |
| Aromatic amine metabolism                                                             | Self     | 11                   | (5); 1               | <b>(0.0059); 0.0100</b> | (>0.5)           | (9); 1               | <b>(0.0012); 0.0020</b>         | (0.28)           | NA               |
| NAD biosynthesis I (from aspartate)                                                   | HumanCyc | 5                    | (4); 4               | <b>(0.0021); 0.0018</b> | (>0.5)           | (4); 4               | <b>(0.0086); 0.0086</b>         | (0.36)           | 44%              |
| NAD salvage pathway II                                                                | HumanCyc | 9                    | (5); 6               | (0.0150); 0.0583        | (>0.5)           | (7); 8               | <b>(0.0033); 0.0068</b>         | (0.32)           |                  |
| Clathrin derived vesicle budding                                                      | Reactome | 15                   | (6); 6               | (0.0210); 0.0189        | (>0.5)           | (9); 9               | <b>(0.0018); 0.0018</b>         | (0.35)           |                  |
| Lysosome Vesicle Biogenesis                                                           | Reactome | 10                   | (6); 7               | <b>(0.0031); 0.0023</b> | (>0.5)           | (7); 7               | <b>(&lt;0.0001); &lt;0.0001</b> | (0.16)           | 49%              |
| Retrograde neurotrophin signaling                                                     | Reactome | 9                    | (4); 4               | <b>(0.0092); 0.0084</b> | (>0.5)           | (4); 4               | (0.0192); 0.0192                | (0.41)           |                  |
| Mitotic Metaphase/Anaphase Transition                                                 | Reactome | 8                    | (3); 3               | <b>(0.0043); 0.0040</b> | (>0.5)           | (3); 3               | (0.0187); 0.0187                | (0.43)           | 55%              |
| Mitotic Prometaphase                                                                  | Reactome | 80                   | (12); 12             | (0.0955); 0.2567        | (>0.5)           | (13); 12             | <b>(0.0095); 0.0346</b>         | (0.37)           |                  |
| Control of skeletal myogenesis by hdac and calcium/calmodulin-dependent kinase (camk) | BioCarta | 21                   | (11); 10             | (0.1216); 0.2322        | (>0.5)           | (7); 3               | <b>(0.0040); 0.0617</b>         | (0.29)           | 12%              |
| B cell receptor signaling pathway                                                     | KEGG     | 75                   | (29); 28             | (0.1121); 0.1931        | (>0.5)           | (10); 9              | <b>(0.0059); 0.0244</b>         | (0.38)           |                  |
| Syndecan-1-mediated signaling events                                                  | PID      | 15                   | (12); 9              | <b>(0.0014); 0.0388</b> | (>0.5)           | (12); 11             | <b>(0.0092); 0.1666</b>         | (0.43)           | 18%              |
| Syndecan-2-mediated signaling events                                                  | PID      | 31                   | (19); 16             | <b>(0.0048); 0.0559</b> | (>0.5)           | (31); 31             | <b>(0.0078); 0.1404</b>         | (0.42)           |                  |
| TGF-beta signaling pathway                                                            | KEGG     | 85                   | (41); 36             | <b>(0.0090); 0.0988</b> | (>0.5)           | (57); 57             | (0.0251); 0.2196                | (>0.5)           | NA               |
| Activated AMPK stimulates fatty-acid oxidation in muscle                              | Reactome | 8                    | (4); 3               | (0.0434); 0.2470        | (>0.5)           | (8); 8               | <b>(0.0017); 0.0454</b>         | (0.41)           |                  |
| AMPK inhibits chREBP transcriptional activity                                         | Reactome | 5                    | (3); 2               | <b>(0.0010); 0.0411</b> | (>0.5)           | (3); 2               | <b>(0.0014); 0.0465</b>         | (0.33)           | 39%              |
| Reversal of insulin resistance by leptin                                              | BioCarta | 10                   | (5); 7               | (0.0170); 0.6432        | (>0.5)           | (10); 2              | <b>(0.0028); 0.1635</b>         | (0.37)           |                  |
| Maturity onset diabetes of the young                                                  | KEGG     | 25                   | (12); 11             | <b>(0.0067); 0.0308</b> | (>0.5)           | (12); 16             | (0.0390); 0.1908                | (>0.5)           | NA               |
| Metabolism of polyamines                                                              | Reactome | 12                   | (6); 4               | <b>(0.0055); 0.0460</b> | (>0.5)           | (7); 5               | <b>(0.0040); 0.0657</b>         | (0.32)           | NA               |

Results of the top ranked pathways ( $P < 0.01$ ) using GSEA and ARTP. In parenthesis are results prior of removal SNPs displaying heterogeneous signals.

<sup>1</sup>The number of genes in the pathway.

<sup>2</sup>The number of genes underlying the enrichment signal in the pathway.

<sup>3</sup>P-value of the enrichment score based on 10,000 permutations.

<sup>4</sup>False-discovery rate calculated based on the normalized statistics of the permutation data to account for the variable sizes of genes and pathways.

doi:10.1371/journal.pone.0029396.t001

### Aromatic amine [AA] metabolism

Table 2 displays the results for the genes in the AA pathway. The enrichment signals in this pathway were mainly driven by SNPs in the *UGT1A9* and *NAT2* genes. SNPs in these genes were identified in the primary analysis of this GWAS [22]. Removing these two genes from the pathway analyses reduced the enrichment signal in the AA metabolism pathway in both methods but still ranked it relatively high using the GSEA ( $P_{GSEA} = 0.0130$ ,  $P_{ARTP} = 0.1217$ ). Apart from *UGT1A9* and *NAT2*, five additional genes in this pathway had SNPs with significant genetic effect ( $P_{trend} < 0.05$ ). These included *NAT1*, *UGT1A4*, *UGT1A6*, *NQO1* and *CYP1B1*.

Some of the genes in the AA metabolism pathway (i.e. *CYP1A1* and *CYP1A2*; *UGT1A4*, *UGT1A6* and *UGT1A9*; *SULT1A1* and *SULT1A2*) occur on the same chromosomal locus and consequently share similar tagging SNPs. To assess the effect of this redundancy on the pathway enrichment signal, we pooled together genes with overlapping SNPs and treated them as a single genetic unit in our pathway analyses. Consequently, the number of loci included in the AA metabolism pathway was reduced to seven, (Table S2) and the corresponding enrichment signals were strengthened ( $P_{GSEA} = 0.0046$ ,  $P_{ARTP} = 0.0001$ ). Even when removing the *NAT2* and *UGT1A* regions from this gene-set, its corresponding enrichment signal remains relatively high ( $P_{GSEA} = 0.024$ ,  $P_{ARTP} = 0.0921$ ).

### NAD metabolism

Two nicotinamide adenine dinucleotide (NAD) metabolism pathways were detected in this analysis. The “NAD biogenesis I” pathway (HumanCyc) was detected by both GSEA and ARTP ( $P_{GSEA} = 0.0018$ ,  $P_{ARTP} = 0.0086$ ), and the “NAD salvage II” pathway (HumanCyc) was detected only by the ARTP method ( $P_{ARTP} = 0.0068$ ). Table 3 presents the results for the genes in these pathways. The three NMNAT genes (*NMNAT1*, *NMNAT2*, and *NMNAT3*) that are shared by both of these two pathways harbor SNPs with significant genetic effect ( $P_{trend} < 0.05$ ) and therefore likely to dominate the significant enrichment signals in these pathways. Other genes displaying significant bladder cancer risk are *QPRT* in the “NAD I” pathway, and *ACP6*, *ITGB1BP3*, *ACPL2* in the “NAD II” pathway.

### Vesicle biogenesis and budding

Three pathways involved in clathrin-dependent vesicle biogenesis and budding were detected in this analysis. The “Lysosome Vesicle Biogenesis” pathway (Reactome) showed the strongest enrichment signal among all pathways in this study, and was detected by both GSEA and ARTP ( $P_{GSEA} = 0.0023$ ,  $P_{ARTP} < 0.0001$ ). The “Clathrin derived vesicle budding” pathway (Reactome) was detected only by ARTP ( $P_{ARTP} = 0.0018$ ), while the “Retrograde neurotrophin signaling” pathway (Reactome) was detected only by GSEA ( $P_{GSEA} = 0.0084$ ). Table 4 displays the

**Table 2.** Summary of genes in the aromatic amine metabolism pathway used for pathway-based analysis of multi-study bladder cancer GWAS.

| Gene    | # SNPs <sup>1</sup> | SNP <sup>2</sup> | SNP <sup>3</sup> rank | MAF <sup>4</sup> | Allelic OR (95% CI) <sup>5</sup> | P-value <sup>6</sup> |      |                        |
|---------|---------------------|------------------|-----------------------|------------------|----------------------------------|----------------------|------|------------------------|
| UGT1A9  | 72                  | rs11892031       | 1                     | 0.08             | 0.77                             | 0.68                 | 0.87 | 3.6 × 10 <sup>-5</sup> |
| NAT2    | 15                  | rs4646249        | 1                     | 0.28             | 0.89                             | 0.83                 | 0.95 | 0.0013                 |
| NAT1    | 11                  | rs9650592        | 1                     | 0.11             | 0.86                             | 0.78                 | 0.96 | 0.0054                 |
| UGT1A4  | 41                  | rs4148328        | 1                     | 0.38             | 0.91                             | 0.85                 | 0.98 | 0.0086                 |
| UGT1A6  | 62                  | rs4148328        | 1                     | 0.38             | 0.91                             | 0.85                 | 0.98 | 0.0086                 |
| NQO1    | 6                   | rs1437135        | 1                     | 0.20             | 0.91                             | 0.84                 | 0.99 | 0.0275                 |
| CYP1B1  | 13                  | rs2855658        | 1                     | 0.43             | 0.94                             | 0.88                 | 1    | 0.0477                 |
| CYP1A1  | 4                   | rs2472297        | 2                     | 0.22             | 1.03                             | 0.95                 | 1.11 | 0.4758                 |
| CYP1A2  | 5                   | rs2472297        | 4                     | 0.22             | 1.03                             | 0.95                 | 1.11 | 0.4758                 |
| SULT1A1 | 1                   | rs1968752        | 1                     | 0.37             | 1.01                             | 0.95                 | 1.08 | 0.7321                 |
| SULT1A2 | 1                   | rs4788073        | 1                     | 0.37             | 0.99                             | 0.93                 | 1.06 | 0.8344                 |

<sup>1</sup>Number of SNPs genotyped in the gene region (20 kb 5' upstream and 10 kb 3' downstream from the gene's coding region).  
<sup>2</sup>The SNP representing the gene in the pathway analysis after the removal of SNPs with heterogeneous effects.  
<sup>3</sup>The rank of the SNP among all SNPs in the gene's region based on their p-values.  
<sup>4</sup>Minor allele frequency among controls.  
<sup>5</sup>Per allele odds ratios +95% confidence intervals from logistic regression models adjusting for age, sex, study center, DNA source, and smoking.  
<sup>6</sup>1 d.f. trend test.  
doi:10.1371/journal.pone.0029396.t002

results for the genes in these pathways. Three genes are shared by the three pathways: *CLTA* and *CLTC*, which encode for the light and heavy chains of clathrin respectively, and *SH3GL2* which is associated with clathrin-mediated endocytosis. The association of SNPs in these three genes with bladder cancer risk ranked them among the top four genes in these pathways.

**Mitosis**

The “Mitotic metaphase/anaphase transition” (Reactome) was detected by the GSEA method ( $P_{GSAE} = 0.0040$ ) and was

marginally significant using ARTP ( $P_{ARTP} = 0.0187$ ). Interestingly, all eight genes in this pathway are included in the more comprehensive “Mitotic prometaphase” pathway that was detected in the initial pathway screening, but had a less significant signal after removing SNPs with heterogeneous signals (Table 1). Results for the eight genes included in the “Mitotic metaphase/anaphase transition” pathway are presented in Table 5. Three SNPs in three genes (*FBXO5*, *SMC3* and *SPC24*) were associated with significant protective effect on bladder cancer ( $P_{trend} < 0.05$ ).

**Table 3.** Summary of genes in the NAD metabolism pathways used for pathway-based analysis of multi-study bladder cancer GWAS.

| Pathway   | Gene     | # SNPs <sup>1</sup> | SNP <sup>2</sup> | SNP <sup>3</sup> rank | MAF <sup>4</sup> | Allelic OR (95% CI) <sup>5</sup> |      |      | P-value <sup>6</sup> |
|-----------|----------|---------------------|------------------|-----------------------|------------------|----------------------------------|------|------|----------------------|
| NAD1/NAD2 | NMNAT3   | 36                  | rs7636269        | 1                     | 0.48             | 1.12                             | 1.05 | 1.20 | 0.0004               |
| NAD2      | ACP6     | 16                  | rs1344           | 1                     | 0.41             | 1.11                             | 1.04 | 1.18 | 0.0017               |
| NAD1      | QPRT     | 7                   | rs3862476        | 1                     | 0.07             | 1.19                             | 1.04 | 1.35 | 0.0087               |
| NAD1/NAD2 | NMNAT2   | 36                  | rs4652795        | 1                     | 0.38             | 0.92                             | 0.86 | 0.98 | 0.0099               |
| NAD1/NAD2 | NMNAT1   | 8                   | rs1220398        | 1                     | 0.14             | 0.89                             | 0.81 | 0.98 | 0.0169               |
| NAD2      | ITGB1BP3 | 8                   | rs2304191        | 1                     | 0.11             | 1.11                             | 1.01 | 1.23 | 0.0355               |
| NAD2      | ACPL2    | 31                  | rs3210458        | 2                     | 0.09             | 1.12                             | 1.00 | 1.25 | 0.0421               |
| NAD2      | NUDT12   | 5                   | rs371315         | 1                     | 0.28             | 1.07                             | 1.00 | 1.15 | 0.0686               |
| NAD2      | NT5C3L   | 6                   | rs9907244        | 1                     | 0.43             | 0.95                             | 0.89 | 1.01 | 0.1094               |
| NAD1      | NADSYN1  | 17                  | rs4945007        | 1                     | 0.06             | 1.10                             | 0.96 | 1.25 | 0.1555               |
| NAD2      | C9orf95  | 19                  | rs7021664        | 1                     | 0.08             | 0.94                             | 0.83 | 1.06 | 0.3193               |

<sup>1</sup>Number of SNPs genotyped in the gene region (20 kb 5' upstream and 10 kb 3' downstream from the gene's coding region).  
<sup>2</sup>The SNP representing the gene in the pathway analysis after the removal of SNPs with heterogeneous effects.  
<sup>3</sup>The rank of the SNP among all SNPs in the gene's region based on their p-values.  
<sup>4</sup>Minor allele frequency among controls.  
<sup>5</sup>Per allele odds ratios +95% confidence intervals from logistic regression models adjusting for age, sex, study center, DNA source, and smoking.  
<sup>6</sup>1 d.f. trend test.  
doi:10.1371/journal.pone.0029396.t003

**Table 4.** Summary of genes in the Clathrin-mediated vesicle pathways used for pathway-based analysis of multi-study bladder cancer GWAS.

| Pathway                      | Gene   | # SNPs <sup>1</sup> | SNP <sup>2</sup> | SNP <sup>3</sup> rank | MAF <sup>4</sup> | Allelic OR (95% CI) <sup>5</sup> |      |      | P-value <sup>6</sup> |
|------------------------------|--------|---------------------|------------------|-----------------------|------------------|----------------------------------|------|------|----------------------|
| Clathrin/Lysosome/Retrograde | CLTA   | 10                  | rs10972786       | 1                     | 0.06             | 1.27                             | 1.11 | 1.45 | 0.0004               |
| Clathrin/Lysosome            | ARRB1  | 29                  | rs667791         | 1                     | 0.39             | 1.11                             | 1.04 | 1.19 | 0.0014               |
| Clathrin/Lysosome/Retrograde | SH3GL2 | 92                  | rs2209426        | 1                     | 0.17             | 0.87                             | 0.80 | 0.95 | 0.0020               |
| Clathrin/Lysosome/Retrograde | CLTC   | 10                  | rs7224631        | 1                     | 0.09             | 1.19                             | 1.06 | 1.32 | 0.0023               |
| Clathrin/Lysosome            | DNAJC6 | 38                  | rs1325607        | 1                     | 0.21             | 1.12                             | 1.03 | 1.21 | 0.0057               |
| Clathrin/Lysosome            | HSPA8  | 8                   | rs11218950       | 1                     | 0.05             | 0.80                             | 0.68 | 0.95 | 0.0087               |
| Retrograde                   | NGF    | 45                  | rs12760036       | 1                     | 0.10             | 0.85                             | 0.76 | 0.96 | 0.0096               |
| Clathrin/Lysosome            | AP1G1  | 7                   | rs9932707        | 1                     | 0.45             | 1.07                             | 1.00 | 1.14 | 0.0353               |
| Clathrin                     | VAMP2  | 3                   | rs3202848        | 1                     | 0.37             | 0.93                             | 0.86 | 1.00 | 0.0572               |
| Clathrin                     | VAMP8  | 9                   | rs719023         | 1                     | 0.39             | 0.94                             | 0.88 | 1.00 | 0.0631               |
| Retrograde                   | DNAL4  | 7                   | rs738141         | 1                     | 0.17             | 1.08                             | 1.00 | 1.18 | 0.0645               |
| Clathrin                     | SNAP23 | 3                   | rs4924682        | 1                     | 0.01             | 1.27                             | 0.95 | 1.70 | 0.1087               |
| Clathrin/Lysosome            | DNM2   | 16                  | rs4804528        | 1                     | 0.43             | 0.95                             | 0.89 | 1.02 | 0.1437               |
| Retrograde                   | DNM1   | 13                  | rs13285411       | 1                     | 0.12             | 0.93                             | 0.84 | 1.03 | 0.1463               |
| Clathrin/Lysosome            | AP1B1  | 14                  | rs5763140        | 1                     | 0.11             | 1.08                             | 0.97 | 1.19 | 0.1500               |
| Clathrin/Lysosome            | ARF1   | 4                   | rs3768331        | 1                     | 0.38             | 1.05                             | 0.98 | 1.12 | 0.1536               |
| Clathrin                     | GBF1   | 15                  | rs1057050        | 1                     | 0.06             | 0.90                             | 0.78 | 1.04 | 0.1673               |
| Retrograde                   | NTRK1  | 13                  | rs1888861        | 1                     | 0.23             | 0.95                             | 0.88 | 1.03 | 0.2275               |
| Retrograde                   | AP2A2  | 12                  | rs7483870        | 1                     | 0.23             | 0.96                             | 0.89 | 1.04 | 0.3014               |
| Retrograde                   | AP2A1  | 9                   | rs2286948        | 1                     | 0.36             | 1.03                             | 0.96 | 1.10 | 0.3694               |
| Clathrin                     | STX4   | 1                   | rs10871454       | 1                     | 0.39             | 1.00                             | 0.94 | 1.07 | 0.9722               |

<sup>1</sup>Number of SNPs genotyped in the gene region (20 kb 5' upstream and 10 kb 3' downstream from the gene's coding region).

<sup>2</sup>The SNP representing the gene in the pathway analysis after the removal of SNPs with heterogeneous effects.

<sup>3</sup>The rank of the SNP among all SNPs in the gene's region based on their p-values.

<sup>4</sup>Minor allele frequency among controls.

<sup>5</sup>Per allele odds ratios +95% confidence intervals from logistic regression models adjusting for age, sex, study center, DNA source, and smoking.

<sup>6</sup>1 d.f. trend test.

doi:10.1371/journal.pone.0029396.t004

## Discussion

Our pathway-based analysis of a large bladder cancer GWAS using two complementary pathway-based methods (GSEA and ARTP) identified an overrepresentation of association signals in seven pathways ('Aromatic amine metabolism', 'NAD biosynthesis', 'NAD salvage', 'Clathrin derived vesicle budding', 'Lysosome vesicle biogenesis', 'Retrograde neurotrophin signaling', and 'Mitotic metaphase/anaphase transition') and suggest involvement in at least three cellular processes (metabolic detoxification, mitosis, and clathrin-mediated vesicles).

The identification of the AA metabolism pathway in this study by both GSEA and ARTP could be considered a good indication for the utility of this approach, since AA metabolism has established relevance to bladder cancer susceptibility. Interestingly, the enrichment signal in this pathway is driven by variations in the *UGT1A* gene cluster and the *NAT1*, *NAT2*, and *NQO1* genes (Table 1) that are involved in detoxification processes in the AA pathway [34,35]. The strong enrichment signal left in this pathway even after the removal of the *UGT1A* and *NAT2* genes from the analysis indicates that other genetic variations affecting aromatic amines detoxification may contribute to bladder cancer susceptibility.

The detection of the NAD metabolism pathway may be relevant to bladder cancer susceptibility through several carcinogenic mechanisms. First, NAD homeostasis has been shown to play a

role in various redox reactions that may lead to irreversible cellular damage and consequently to the initiation of malignant tumor [43]. In addition, NAD has been shown to be involved in DNA repair and telomere maintenances [44] as well as in energy production both of which are important processes in cancer development. Interestingly, NAD metabolism pathway has been implicated in a recent pathway-based analysis of colon cancer GWAS [14]. Colon and bladder cancers have been associated with *NAT2* acetylation status. For bladder cancer, in which N-acetylation is a detoxification step, *NAT2* slow acetylator phenotype presents a higher risk. In contrast, for heterocyclic amine-related colon cancer in which N-acetylation is negligible and O-acetylation is a carcinogen-activation step, *NAT2* rapid acetylator phenotype presents a higher risk [45]. Thus, similar metabolic pathways could play diverse roles in the etiology of these two cancers.

Three clathrin-mediated vesicle pathways are also highlighted in this study. Clathrin-coated vesicles play essential role in intracellular trafficking, endocytosis, and exocytosis [46]. In this realm, it has been shown that clathrin-mediated vesicle pathways regulate the signaling and cellular localization of several growth factors [47] that are known to play a role in cancer susceptibility. Interestingly, clathrin may be also relevant to the Mitotic Metaphase/Anaphase transition pathway that was also implicated in this study. During mitosis, clathrin helps stabilizing the

**Table 5.** Summary of genes in the Mitotic Metaphase/Anaphase Transition pathway used for pathway-based analysis of multi-study bladder cancer GWAS.

| Gene   | # SNPs <sup>1</sup> | SNP <sup>2</sup> | SNP <sup>3</sup> rank | MAF <sup>4</sup> | Allelic OR (95% CI) <sup>5</sup> |      |      | P-value <sup>6</sup> |
|--------|---------------------|------------------|-----------------------|------------------|----------------------------------|------|------|----------------------|
| FBXO5  | 11                  | rs9479476        | 1                     | 0.11             | 0.83                             | 0.75 | 0.93 | 0.0010               |
| SMC3   | 8                   | rs7918064        | 1                     | 0.27             | 0.90                             | 0.84 | 0.97 | 0.0073               |
| SPC24  | 18                  | rs4804149        | 2                     | 0.28             | 0.92                             | 0.85 | 0.99 | 0.0202               |
| CENPQ  | 7                   | rs4267943        | 1                     | 0.36             | 0.94                             | 0.87 | 1.01 | 0.0706               |
| NDC80  | 15                  | rs13381300       | 1                     | 0.07             | 0.91                             | 0.80 | 1.04 | 0.1673               |
| NUP107 | 7                   | rs11177325       | 1                     | 0.31             | 0.95                             | 0.89 | 1.02 | 0.1951               |
| CENPA  | 4                   | rs2060390        | 1                     | 0.26             | 0.98                             | 0.91 | 1.06 | 0.6106               |
| SMC1A  | 2                   | rs1264013        | 1                     | 0.42             | 1.00                             | 0.95 | 1.05 | 0.9876               |

<sup>1</sup>Number of SNPs genotyped in the gene region (20 kb 5' upstream and 10 kb 3' downstream from the gene's coding region).

<sup>2</sup>The SNP representing the gene in the pathway analysis after the removal of SNPs with heterogeneous effects.

<sup>3</sup>The rank of the SNP among all SNPs in the gene's region based on their p-values.

<sup>4</sup>Minor allele frequency among controls.

<sup>5</sup>Per allele odds ratios +95% confidence intervals from logistic regression models adjusting for age, sex, study center, DNA source, and smoking.

<sup>6</sup>1 d.f. trend test.

doi:10.1371/journal.pone.0029396.t005

kinetochore fibers which are required for the proper function of the mitotic spindle [48]. Thus, the overrepresentation of association signals in two distinct pathways associated with mitosis suggest that perturbations in the mitotic process, and particularly those related to the metaphase/anaphase transition, may modify the risk of human bladder cancer.

Strengths of our study are the large sample size; the use of primary scan data from five independent studies allowing us to address consistency of effects across the different populations; and the use of two complementary pathway-based methods. A limitation of our study is the lack of pathway-based signals to reach a noteworthy FDR significance level, with only one pathway (Lysosome Vesicle Biogenesis) having an FDR value <0.2. This could be partially due to the inherent limits of the methods used, the inadequate annotation of relevant pathways in public databases, or due to weak association signals in our data. Recent analysis of

bladder cancers using RNA expression data, have also highlighted enrichment of genes with similar processes as we identified in our genomic data here, including metabolic processes, which provide further plausibility that the pathways identified may be relevant to bladder cancer susceptibility [49]. Furthermore, the high rank of the AA metabolism pathway in both GSEA and ARTP support the power of these methods to highlight pathways with established relevance to bladder cancer susceptibility and may therefore similarly suggest the involvement of metabolic detoxification, mitosis and clathrin-mediated pathways in bladder carcinogenesis.

## Supporting Information

### Table S1 Details and results for all 1423 pathways included in this study.

(XLS)

### Table S2 List of genes included in the 22 self-constructed candidate pathways.

(XLS)

## Acknowledgments

We would like to thank Leslie Carroll (Information Management Services, Silver Spring, MD, USA), Gemma Castaño-Vinyals (Institut Municipal d'Investigació Mèdica, Barcelona, Spain), Fernando Fernández (Institut Municipal d'Investigació Mèdica, Barcelona, Spain), Paul Hurwitz (Westat, Inc., Rockville, MD, USA)

Charles Lawrence (Westat, Inc., Rockville, MD, USA), Marta Lopez-Brea (Marqués de Valdecilla University Hospital, Santander, Cantabria, Spain), Anna McIntosh (Westat, Inc., Rockville, MD, USA)

Angeles Panadero (Hospital Ciudad de Coria, Coria (Cáceres), Spain), Fernando Rivera (Marqués de Valdecilla University Hospital, Santander, Cantabria, Spain), Robert Saal (Westat, Rockville, MD, USA)

Maria Sala (Institut Municipal d'Investigació Mèdica, Barcelona, Spain), Kirk Snyder (Information Management Services, Inc., Silver Spring, MD), Anne Taylor (Information Management Services, Inc., Silver Spring, MD), Montserrat Torà (Institut Municipal d'Investigació Mèdica, Barcelona, Spain), Jane Wang (Information Management Services, Silver Spring, MD, USA)

## Author Contributions

Conceived and designed the experiments: IM JDF MG NC SJC DTS NR. Performed the experiments: ZW KBJ AH LB. Analyzed the data: IM JF QY DM. Contributed reagents/materials/analysis tools: NM AP LP FXR MT DA MPP MK YF WT AT CS AC RG JL AJ MS AS GA AB AJJ RWD SMG SJW JV NEC MTL JFF. Wrote the paper: IM JF.

## References

- Hindorf LA, Sethupathy P, Junkins HA, Ramos EM, Mehta JP, et al. (2009) Potential etiologic and functional implications of genome-wide association loci for human diseases and traits. *Proc Natl Acad Sci U S A* 106: 9362–9367.
- Manolio TA, Collins FS, Cox NJ, Goldstein DB, Hindorf LA, et al. (2009) Finding the missing heritability of complex diseases. *Nature* 461: 747–753.
- Eichler EE, Flint J, Gibson G, Kong A, Leal SM, et al. (2010) Missing heritability and strategies for finding the underlying causes of complex disease. *Nat Rev Genet* 11: 446–450.
- Park JH, Wacholder S, Gail MH, Peters U, Jacobs KB, et al. (2010) Estimation of effect size distribution from genome-wide association studies and implications for future discoveries. *Nat Genet* 42: 570–575.
- Elbers CC, van Eijk KR, Franke L, Mulder F, van der Schouw YT, et al. (2009) Using genome-wide pathway analysis to unravel the etiology of complex diseases. *Genet Epidemiol*.
- Wang K, Li M, Hakonarson H (2010) Analysing biological pathways in genome-wide association studies. *Nat Rev Genet* 11: 843–854.
- Baranzini SE, Galwey NW, Wang J, Khankhanian P, Lindberg R, et al. (2009) Pathway and network-based analysis of genome-wide association studies in multiple sclerosis. *Hum Mol Genet*.
- Perry JR, McCarthy MI, Hattersley AT, Zeggini E, Weedon MN, et al. (2009) Interrogating Type 2 Diabetes Genome-Wide Association Data Using a Biological Pathway-Based Approach. *Diabetes*.
- Zhong H, Yang X, Kaplan LM, Molony C, Schadt EE (2010) Integrating pathway analysis and genetics of gene expression for genome-wide association studies. *Am J Hum Genet* 86: 581–591.
- Wang K, Zhang H, Kugathasan S, Anness V, Bradfield JP, et al. (2009) Diverse genome-wide association studies associate the IL12/IL23 pathway with Crohn Disease. *Am J Hum Genet* 84: 399–405.
- Chen X, Wang L, Hu B, Guo M, Barnard J, et al. (2010) Pathway-based analysis for genome-wide association studies using supervised principal components. *Genet Epidemiol* 34: 716–724.
- Wang K, Li M, Bucan M (2007) Pathway-Based Approaches for Analysis of Genome-wide Association Studies. *Am J Hum Genet* 81: 1278–1283.
- Lesnick TG, Papapetropoulos S, Mash DC, French-Mullen J, Shehadeh L, et al. (2007) A genomic pathway approach to a complex disease: axon guidance and Parkinson disease. *PLoS Genet* 3: e98.
- Chen LS, Hutter CM, Potter JD, Liu Y, Prentice RL, et al. (2010) Insights into colon cancer etiology via a regularized approach to gene set analysis of GWAS data. *Am J Hum Genet* 86: 860–871.
- Menashe I, Maeder D, Garcia-Closas M, Figueroa JD, Bhattacharjee S, et al. (2010) Pathway analysis of breast cancer genome-wide association study highlights three pathways and one canonical signaling cascade. *Cancer Res* 70: 4453–4459.
- Silverman DT, Devesa SS, Moore LE, Rothman N (2006) Bladder cancer. In: Schottenfeld D, Fraumeni JF, Jr., eds. *Cancer Epidemiology and Prevention*. 3 ed. New York: Oxford University Press. pp 1101–1127.

17. Silverman DT, Hartge P, Morrison AS, Devesa SS (1992) Epidemiology of bladder cancer. *Hematol Oncol Clin North Am* 6: 1–30.
18. Vineis P, Pirastu R (1997) Aromatic amines and cancer. *Cancer Causes Control* 8: 346–355.
19. Talaska G (2003) Aromatic amines and human urinary bladder cancer: exposure sources and epidemiology. *J Environ Sci Health C Environ Carcinog Ecotoxicol Rev* 21: 29–43.
20. Garcia-Closas M, Malats N, Silverman D, Dosemeci M, Kogevinas M, et al. (2005) NAT2 slow acetylation, GSTM1 null genotype, and risk of bladder cancer: results from the Spanish Bladder Cancer Study and meta-analyses. *Lancet* 366: 649–659.
21. Moore LE, Baris DR, Figueroa JD, Garcia-Closas M, Karagas MR, et al. (2011) GSTM1 null and NAT2 slow acetylation genotypes, smoking intensity and bladder cancer risk: results from the New England bladder cancer study and NAT2 meta-analysis. *Carcinogenesis* 32: 182–189.
22. Rothman N, Garcia-Closas M, Chatterjee N, Malats N, Wu X, et al. (2010) A multi-stage genome-wide association study of bladder cancer identifies multiple susceptibility loci. *Nat Genet* 42: 978–984.
23. Kiemeny LA, Sulem P, Besenbacher S, Vermeulen SH, Sigurdsson A, et al. (2010) A sequence variant at 4p16.3 confers susceptibility to urinary bladder cancer. *Nat Genet* 42: 415–419.
24. Kiemeny LA, Thorlacius S, Sulem P, Geller F, Aben KK, et al. (2008) Sequence variant on 8q24 confers susceptibility to urinary bladder cancer. *Nat Genet* 40: 1307–1312.
25. Wu X, Ye Y, Kiemeny LA, Sulem P, Rafnar T, et al. (2009) Genetic variation in the prostate stem cell antigen gene PSCA confers susceptibility to urinary bladder cancer. *Nat Genet* 41: 991–995.
26. BioCarta website. Available: <http://www.biocarta.com/genes/allpathways.asp>. Accessed 2011 Mar 10.
27. KEGG website. Available: <http://www.genome.jp/kegg/pathway.html>. Accessed 2011 Mar 10.
28. Pathway Interaction Database. Available: <http://pid.nci.nih.gov>. Accessed 2011 Mar 10.
29. Reactome website. Available: <http://www.reactome.org>. Accessed 2011 Mar 10.
30. HumanCyc website. Available: <http://humancyc.org>. Accessed 2011 Mar 10.
31. Figueroa JD, Malats N, Rothman N, Real FX, Silverman D, et al. (2007) Evaluation of genetic variation in the double-strand break repair pathway and bladder cancer risk. *Carcinogenesis* 28: 1788–1793.
32. Figueroa JD, Malats N, Real FX, Silverman D, Kogevinas M, et al. (2007) Genetic variation in the base excision repair pathway and bladder cancer risk. *Hum Genet* 121: 233–242.
33. Figueroa JD, Garcia-Closas M, Rothman N (2010) Case studies: Cumulative assessment of the role of human genome variation in specific diseases - bladder cancer. In: Khoury M, Bedrosian S, Gwinn M, Higgins J, Ioannidis J, et al. eds. *Human Genome Epidemiology, 2nd Edition Building the evidence for using genetic information to improve health and prevent disease* Oxford University Press.
34. Skipper PL, Tannenbaum SR (1994) Molecular dosimetry of aromatic amines in human populations. *Environ Health Perspect* 102 Suppl 6: 17–21.
35. Skipper PL, Kim MY, Sun HL, Wogan GN, Tannenbaum SR (2010) Monocyclic aromatic amines as potential human carcinogens: old is new again. *Carcinogenesis* 31: 50–58.
36. Ingenuity website. Available: <http://www.ingenuity.com/>. Accessed 2010 Feb 24.
37. The Gene Ontology website. Available: <http://www.geneontology.org/>. Accessed 2010 Feb 24.
38. Veyrieras JB, Kudaravalli S, Kim SY, Dermitzakis ET, Gilad Y, et al. (2008) High-resolution mapping of expression-QTLs yields insight into human gene regulation. *PLoS Genet* 4: e1000214.
39. Yu K, Li Q, Bergen AW, Pfeiffer RM, Rosenberg PS, et al. (2009) Pathway analysis by adaptive combination of P-values. *Genet Epidemiol* 33: 700–709.
40. Dudbridge F, Koeleman BP (2003) Rank truncated product of P-values, with application to genomewide association scans. *Genet Epidemiol* 25: 360–366.
41. Hoh J, Wille A, Ott J (2001) Trimming, weighting, and grouping SNPs in human case-control association studies. *Genome Res* 11: 2115–2119.
42. Higgins JP, Thompson SG (2002) Quantifying heterogeneity in a meta-analysis. *Stat Med* 21: 1539–1558.
43. Magni G, Orsomando G, Raffelli N, Ruggieri S (2008) Enzymology of mammalian NAD metabolism in health and disease. *Front Biosci* 13: 6135–6154.
44. Burkle A (2005) Poly(ADP-ribose). The most elaborate metabolite of NAD+. *FEBS J* 272: 4576–4589.
45. Hein DW (2002) Molecular genetics and function of NAT1 and NAT2: role in aromatic amine metabolism and carcinogenesis. *Mutat Res* 506–507: 65–77.
46. Royle SJ (2006) The cellular functions of clathrin. *Cell Mol Life Sci* 63: 1823–1832.
47. Kirisits A, Pils D, Krainer M (2007) Epidermal growth factor receptor degradation: an alternative view of oncogenic pathways. *Int J Biochem Cell Biol* 39: 2173–2182.
48. Royle SJ, Bright NA, Lagnado L (2005) Clathrin is required for the function of the mitotic spindle. *Nature* 434: 1152–1157.
49. Li X, Chen J, Hu X, Huang Y, Li Z, et al. (2011) Comparative mRNA and microRNA expression profiling of three genitourinary cancers reveals common hallmarks and cancer-specific molecular events. *PLoS One* 6: e22570.
