# Supplementary material for: Large-Scale Pathway-Based Analysis of Bladder Cancer Genome-Wide Association Data from Five Studies of European Background
Source: PLoS One. 2012 Jan 4;7(1):e29396. doi: 10.1371/journal.pone.0029396 (PMC3251580; doi:10.1371/journal.pone.0029396)
Supplement: Table S2 — List of genes included in the 22 self-constructed candidate pathways. (XLS) [file pone.0029396.s002.xls]

## Sheet: Self constructed pathways
Pathway name	Angiogenesis	Apoptosis	Aromatic amine metabolism	Aromatic/PAH metabolism	Arsenic	Base-Excision Repair	BCG Susceptibility	Carcinogen metabolism	Cell cycle	Death receptor pathway	DNA repair	Double Strand Break Repair	Microarrays	Mismatch repair	MMP pathway	Oxidative damage	PAH metabolism	PI3K-Akt pathway	SOX4	Telomere length	VEGF	WNT signalling
# of genes	30	106	11	20	21	23	8	44	10	42	72	36	22	10	29	6	16	14	18	21	31	30
Genes names	ARNT	BCL10	CYP1B1	EPHX1	CTH	MUTYH	TLR5	AKR1A1	BARD1	BCL10	EXO1	RNF11	CD46	EXO1	TIMP4	GPX1	EPHX1	AKT3	BAZ2B	RAP1A	ARNT	DVL1
	EPHA2	CASP9	UGT1A4	GSTM1	MTHFR	OGG1	CCL20	EPHX1	CCNT2	CASP9	MSH4	SFN	S100A4	MSH4	PDGFRB	GPX3	GSTM1	PRKAA2	PELI1	NXPH2	EPHA2	HSPG2
	PROX1	DAP3	UGT1A6	CYP1B1	MTR	NEIL3	SLC11A1	GSTM1	CCNH	TNFRSF25	RNF11	NHEJ1	SF3B1	MSH6	MMP16	GPX5	CYP1B1	PRKAB2	TRIB2	TERC	PROX1	CREB1
	SHC1	DIO1	UGT1A9	UGT1A1	GPX1	NEIL2	STAT1	GSTM2	CDK6	BCL2L11	RPA2	XRCC5	TRAK1	PMS1	RECK	GSR	AKR1B10	PDK1	PLXNB1	TERT	SHC1	FRZB
	TIE1	GADD45A	NAT1	AKR1B10	EGF	POLB	IL12A	GSTM3	CDKN2B	CASP10	SFN	BAP1	UPK1B	MLH1	MMP21	GPX2	CYP3A4	PIK3CA	C5orf13	POT1	TIE1	FZD7
	NRP2	IL10	NAT2	CYP3A4	GPX3	MGMT	IL12B	GSTM4	DBC1	CASP8	BARD1	MRE11B	TRIM26	MSH3	MMP1	GPX4	AKR1C1	PIK3CG	MEF2C	PINX1	NRP2	CTNNB1
	EIF2B5	LMOD1	CYP1A1	NAT1	MTRR	FEN1	TNF	GSTM5	CCND1	CFLAR	MSH6	NEK1	WTAP	MSH5	MMP10		AKR1C2	RHEB	SRP19	RECQL4	EIF2B5	DVL3
	VHL	PIK3R3	CYP1A2	NAT2	GPX5	POLE	TLR4	CYP1B1	CDKN1B	BCL6	NHEJ1	MAPK9	VDAC3	PMS2	MMP12		AKR1C3	TSC1	E2F3	TERF1	PPARG	DKK2
	FGF2	TNFRSF25	NQO1	AKR1C1	PON1	SMUG1		PAPSS1	PAK6	TNFSF10	PMS1	RAD50	PSMB7	HMGB1	MMP13		AKR1C4	ILK	HIST1H3E	TNKS	VHL	LEF1
	VEGFC	TP53BP2	SULT1A1	AKR1C2	PON2	TDG		AHRR	CCNE1	CASP3	POLE4	XRCC4	NET1	ATMIN	MMP20		GSTP1	PRKAB1	NEDD9	WRN	VEGFC	SFRP2
	VEGFA	TP73	SULT1A2	AKR1C3	PON3	UNG		HSD17B4		CASP6	XRCC5	RINT1	RNH1		MMP26		CYP1A1	TSC2	DOCK4	TNKS2	VEGFA	APC
	EPHA1	ZFYVE9		AKR1C4	GGH	APEX1		GSTA1		BAK1	BAP1	TRRAP	SORL1		MMP27		NQO1	NF1	INHBA	TNKS1BP1	EPHA1	SFRP4
	NOS3	BAZ2B		GSTP1	GSR	PARP2		GSTA2		CASP8AP2	MLH1	XRCC2	SSH3		MMP3		SULT1A1	PDK2	CUZD1	DDX11	NOS3	BMP1
	ANGPT1	BCL2L11		CYP1A1	FOLR1	POLE2		GSTA3		TNFRSF21	MRE11B	PRKDC	STX3		MMP7		SULT1A2	AKT2	ZNF195	RECQL	ANGPT1	SFRP1
	ANGPT2	CASP10		CYP1A2	GPX2	NEIL1		GSTA4		CASP2	RFC4	ABL1	KRT5		MMP8		MPO		CDK2AP1	PARP2	ANGPT2	CER1
	SYK	CASP8		NQO1	TP53	MPG		AHR		TNFRSF10C	XPC	DCLRE1C	MBNL2		MMP17		GSTT1		STK38L	TEP1	SYK	DKK1
	NRP1	CFLAR		SULT1A1	TYMS	NTHL1		AKR1B10		TNFRSF10D	NEK1	H2AFX	PIF1		MMP19				MAP2K5	ACD	NRP1	FZD8
	VEGFB	PELI1		SULT1A2	GPX4	HAP1		CYP3A4		TRAF2	RFC1	MRE11A	SMG1		MMP14				ZC4H2	TERF2	VEGFB	MAPK8
	PXN	STK17B		MPO	GSS	LIG3		EPHA1		CASP7	MAPK9	MUS81	KRT13		MMP15					TERF2IP	PXN	SFRP5
	SP1	TRIB2		GSTT1	CBS	PNKP		GSTK1		FAS	MSH3	RAG1	KRT20		MMP2					RECQL5	SP1	DKK3
	THSD1	BCL6			GGT1	POLD1		CYP7B1		CASP1	RAD50	RAG2	LAMA3		MMP25					DKC1	THSD1	LRP5
	HIF1A	MLH1				XRCC1		NAT1		CASP12	XRCC4	MDM2	MSN		MMP28						HIF1A	HNF1A
	CDH5	PLXNB1				PCNA		NAT2		CASP4	MSH5	RAD52			ILF3						CDH5	LRP6
	FOXC2	RASSF1						AKR1C1		CASP5	PMS2	BRCA2			MMP24						FOXC2	WIF1
	ITGB3	TGFBR2						AKR1C2		FADD	POLD2	LIG4			MMP9						ITGB3	WNT1
	STAT3	TNFSF10						AKR1C3		APAF1	RFC2	XRCC3			MMP11						STAT3	FZD2
	EGLN2	CASP3						AKR1C4		BCL2L14	RINT1	BLM			PDGFB						EGLN2	TCF4
	ELAVL1	CASP6						CYP2C19		BCL7A	RPA3	PALB2			TIMP3						ELAVL1	TCF3
	TFF3	C5orf13						CYP2C9		CDK4	TRRAP	BRCA1			TIMP1						TFF3	BMP2
	PLP2	MEF2C						CYP2E1		BCL2L2	XRCC2	EME1									PPARA	CSNK2A1
		SRP19						GSTO1		BCL2A1	PRKDC	RAD51C									PLP2
		TERT						PAPSS2		BCL2L10	ABL1	RAD51L3
		BAG2						GSTP1		BCL7C	POLE3	ZNF350
		BAK1						GSTZ1		TRADD	RAD23B	DMC1
		CASP8AP2						CYP1A1		TRAF4	XPA	XRCC6
		E2F3						CYP1A2		BAX	DCLRE1C	ATRX
		FYN						LIPC		BCL2L12	MMS19
		HIST1H3E						SULT1A1		CASP14	DDB1
		NEDD9						SULT1A2		MIRHG2	DDB2
		PDCD2						CYP24A1		BCL2L13	H2AFX
		PIM1						COMT		BID	MRE11A
		RIPK1						CYP2D6		BIK	MUS81
		SOX4						GSTT1			POLD4
		STK19						GSTT2			RAG1
		TNFRSF21									RAG2
		CASP2									MDM2
		DOCK4									POLE
		INHBA									RAD52
		STK17A									RFC5
		BAG4									BRCA2
		MYC									HMGB1
		RIPK2									LIG4
		TNFRSF10C									RFC3
		TNFRSF10D									POLE2
		BAG1									XRCC3
		CD274									BLM
		DAPK1									ATMIN
		JAK2									PALB2
		PDCD1LG2									BRCA1
		TGFBR1									EME1
		TRAF2									RAD51C
		BAG3									RAD51L3
		CASP7									RPA1
		CUZD1									ERCC1
		FAS									LIG1
		MAPK8									RAD23A
		PTEN									ZNF350
		CASP1									DMC1
		CASP12									XRCC6
		CASP4									ATRX
		CASP5									CETN2
		FADD									RPA4
		LMO2
		ZNF195
		APAF1
		BCL2L14
		BCL7A
		CDK2AP1
		CDK4
		KRAS
		STK38L
		EDNRB
		BAG5
		BCL2L2
		BCL2A1
		BCL2L10
		MAP2K5
		SMAD3
		BCL7C
		NOD2
		TRADD
		TP53
		TRAF4
		SMAD2
		SMAD4
		BAX
		BCL2L12
		CASP14
		DAPK3
		TGFB1
		MIRHG2
		BCL2L13
		BID
		BIK
		PLA2G6
		ZC4H2
